# Supplementary material for: An ultra-sensitive fluorescence multi-channel and colorimetric probe based on salicylaldehyde hydrazone for Al3+ recognition with a 3 : 1 binding ratio
Source: Royal Society of Chemistry journal article supplement (doi:10.1039/d4tc02315c), 2024-01-01
Supplement: d4tc02315c1.pdf [file d4tc02315c1.pdf]

# Supporting Information

1

2

3

4

5

6

7

8

9

10

11

12

13

14

15

16

17

18

19

20

21

22

## **An ultra-sensitive fluorescence multi-channels and colorimetric probe based on salicylaldehyde hydrazone for Al<sup>3+</sup> recognition with 3:1 a binding ratio**

Zhongyan Zhang<sup>a,b,c#</sup>, Sha Wang<sup>a#</sup>, Muxi Wang<sup>a</sup>, Hongming Li<sup>a</sup>, Qingjian Liang<sup>d</sup>,

Jiawei Tang<sup>a</sup>, Jian Sun<sup>e\*</sup>, Li-Jun Ma<sup>a,b,c\*</sup>, Hong Liu<sup>c</sup>

<sup>a</sup>*School of Chemistry, South China Normal University, Guangzhou, 510006, P. R. China;*

<sup>b</sup>*Key Laboratory of Analytical Chemistry for Biomedicine, South China Normal University, Guangzhou 510006, P. R. China;*

<sup>c</sup>*Key Laboratory of Theoretical Chemistry of Environment Ministry of Education, South China Normal University, Guangzhou, 510631, P. R. China;*

<sup>d</sup>*School of Fishery Zhejiang Ocean University, Zhoushan, Zhejiang, 316022, P. R. China;*

<sup>e</sup>*College of Pharmacy, Xinjiang Medical University, Urumqi, 830011, China*

# *These co-first authors contributed equally to this work*

\*Corresponding author email:

[jjiansun@ciac.ac.cn](mailto:jjiansun@ciac.ac.cn) (Jian Sun); [mlj898021@scnu.edu.cn](mailto:mlj898021@scnu.edu.cn) (Li-Jun Ma)

23

## 24 Contents

|    |                                                                                         |    |
|----|-----------------------------------------------------------------------------------------|----|
| 25 | 1. Reagents and apparatus.....                                                          | S3 |
| 26 | 2. Methods .....                                                                        | S3 |
| 27 | 3. Fluorescence test paper of SBN.....                                                  | S3 |
| 28 | 4. Cell culture.....                                                                    | S4 |
| 29 | 5. Computational details .....                                                          | S4 |
| 30 | 6. <sup>1</sup> H NMR and <sup>13</sup> C NMR spectra of SBN.....                       | S5 |
| 31 | 7. HR-MS spectrum of SBN .....                                                          | S6 |
| 32 | 8. Sensitivity fitting based on UV-vis and fluorescence excitation spectra of SBN ..... | S6 |
| 33 |                                                                                         |    |
| 34 |                                                                                         |    |

## 35 **1. Reagents and apparatus**

36 Nicotinic acid hydrazide and 4-(diethylamino)-salicylaldehyde were purchased from  
37 J&K Scientific LTD (Beijing). All reagents and solvents (analytical grade) for synthesis  
38 and analysis used in the experiments were used without further purification after  
39 purchase. Distilled-deionized water was used to prepare all aqueous solutions.

40 The spectra of the  $^{13}\text{C}$  NMR and  $^1\text{H}$  NMR were recorded on a VARIAN NMR  
41 Systems 600 MHz spectrometer and the internal standard was tetramethylsilane (TMS).  
42 HRMS spectra were obtained with BRUKER SOLAN X70 FT-MS spectrometer.  
43 Fluorescence measurements were carried out on a HITACHI F-4600 fluorescence  
44 spectrophotometer, and UV-vis spectra were acquired on a SHIMADZU UV-2700  
45 spectrophotometer.

## 46 **2. Methods**

47 A stock solution (5.0 mM) of probe SBN was prepared by dissolving in  
48 dimethylformamide (DMF). Unless otherwise specified, the test solutions of SBN (20.0  
49  $\mu\text{M}$ ) were prepared by diluting the above stock solutions with deionized water. Stock  
50 solutions of various metal ions were prepared by dissolving their hydrochloride salts or  
51 nitrate salts in distilled water. All tests were performed at room temperature. The  
52 excitation wavelengths in the testing of fluorescence emission spectra are 365 and 425  
53 nm, respectively. The emission wavelengths in the testing of fluorescence excitation  
54 spectra are 459 and 512 nm, respectively. The limit of detection (LOD) was calculated  
55 using the following equation: detection limit =  $3S/\rho$ , where S is the standard deviation  
56 of the intensity of the free sensor, and  $\rho$  is the slope between fluorescence or UV-vis  
57 absorption intensity versus sample concentration.<sup>1, 2</sup> The time interval was 15 min  
58 between the various cycles in the reversibility experiments.

## 59 **3. Fluorescence test paper of SBN**

60 The qualitative filter papers produced by Hangzhou Special Paper Co., Ltd. were cut  
61 into 1.5 cm\*3.0 cm test paper strips. Then, these test strips were immersed in DMF  
62 solution of SBN and dried in air to obtain fluorescence detection test strips.<sup>3, 4</sup>

#### 63 4. Cell culture

64 Epinephelus coioides spleen cells were maintained in Leibovitz's Medium (L-15,  
65 GIBCO, USA) supplemented with 10 % heat-inactivated fetal bovine serum (FBS,  
66 GIBCO, USA) and penicillin (100 IU/ml)/streptomycin (100 mg/ml) at 28 °C for 24 h.  
67 Thereafter, the cells were seeded in 24 well-plates with cell climbing slice.<sup>5</sup>

#### 68 5. Computational details

69 The  $\omega$ B97XD density functional<sup>6, 7</sup> including an attractive dispersion term was used  
70 to optimize the geometries of SBN-Al<sup>3+</sup>, and followed by frequency calculations  
71 without any symmetry or geometrical constraints to verify the minima nature of  
72 optimized structure. In these calculations, the 6-31G (d, p) basis set was used for C, H,  
73 O and N atoms and the aluminum atom was treated by SDD[8]. All quantum chemical  
74 computations were performed by using the Gaussian09 package of programs [9].

75

#### 76 References

- 77 1. Z. Ou, M. Wang, Z. Zhang, J. Liang, J. Tang, X. Lei, L. Yang, H. Liu, L. -J. Ma,  
78 *Microchem. J.*, 2023, **195**, 109386.
- 79 2. X. Lei, Y. Zou, Q. Liang, W. Xu, S. Lao, B. Yang, L. Li, L. Yang, H. Liu, L. -J. Ma,  
80 *J. Photochem. Photobiol. A-Chem.*, 2022, **428**, 113854.
- 81 3. T. Liu, Z. Huang, R. Feng, Z. Ou, S. Wang, L. Yang, L. -J. Ma, *Dyes Pigm.*, 2020,  
82 **174**, 108102.
- 83 4. S. Wang, Z. Zhang, Z. Huang, X. Lei, Y. Wang, L. Li, L. Yang, H. Liu, F. Sun, L. -  
84 J. Ma, *J. Photoch. Photobio. A-Chem.*, 2021, **418**, 113438.
- 85 5. L. -J. Ma, Q. Liang, R. Feng, Z. Lv, F. Cui, L. Li, L. Yang, H. Liu, F. Sun, *J. Photoch.*  
86 *Photobio. A-Chem.*, 2021, **408**, 113086.
- 87 6. J. -D. Chai, M. Head-Gordon, *J. Chem. Phys.*, 2008, **128**, 084106.
- 88 7. J. -D. Chai, M. Head-Gordon, Long-range corrected hybrid density functionals with  
89 damped atom–atom dispersion corrections, *Phys. Chem. Chem. Phys.*, 2008, **10**,  
90 6615–6620.
- 91 8. D. Andrae, U. Häußermann, M. Dolg, H. Stoll, H. Preuß, *Theor. Chim. Acta*, 1990,

92 77, 123–141.

93 9. M. J. Frisch, G. W. Trucks, H. B. Schlegel, G. E. Scuseria, M. A. Robb, J. R.  
94 Cheeseman, G. Scalmani, V. Barone, B. Mennucci, G. A. Petersson, H. Nakatsuji,  
95 M. Caricato, X. Li, H. P. Hratchian, A. F. Izmaylov, J. Bloino, G. Zheng, J. L.  
96 Sonnenberg, M. Hada, M. Ehara, K. Toyota, R. Fukuda, J. Hasegawa, M. Ishida, T.  
97 Nakajima, Y. Honda, O. Kitao, H. Nakai, T. Vreven, Jr. J. A. Montgomery, J. E.  
98 Peralta, F. Ogliaro, M. J. Bearpark, J. Heyd, E. N. Brothers, K. N. Kudin, V. N.  
99 Staroverov, R. Kobayashi, J. Normand, K. Raghavachari, A. P. Rendell, J. C. Burant,  
100 S. S. Iyengar, J. Tomasi, M. Cossi, N. Rega, N. J. Millam, M. Klene, J. E. Knox, J.  
101 B. Cross, V. Bakken, C. Adamo, J. Jaramillo, R. Gomperts, R. E. Stratmann, O.  
102 Yazyev, A. J. Austin, R. Cammi, C. Pomelli, J. W. Ochterski, R. L. Martin, K.  
103 Morokuma, V. G. Zakrzewski, G. A. Voth, P. Salvador, J. J. Dannenberg, S.  
104 Dapprich, A. D. Daniels, Ö. Farkas, J. B. Foresman, J. V. Ortiz, J. Cioslowski, D. J.  
105 Fox, Gaussian 09, Gaussian, Inc., Wallingford, CT, USA, 2009.

106

107

## 108 6. $^1\text{H}$ NMR and $^{13}\text{C}$ NMR spectra of SBN

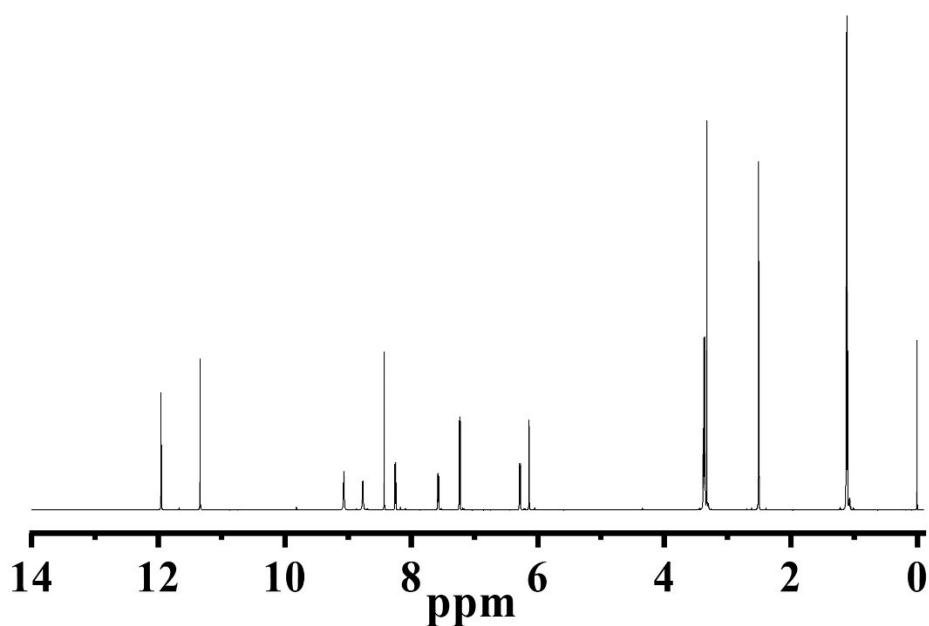

109

110  
111  
112

Figure. S1.  $^1\text{H}$  NMR spectrum of SBN.

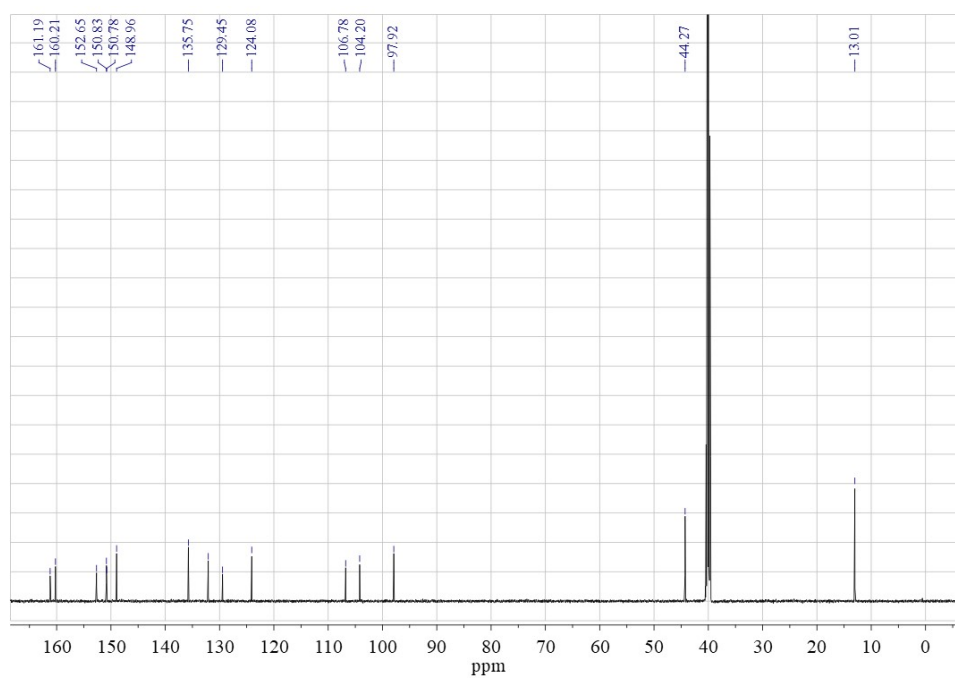

113  
114  
115

Figure. S2.  $^{13}\text{C}$  NMR spectrum of SBN.

### 116 7. HR-MS spectrum of SBN

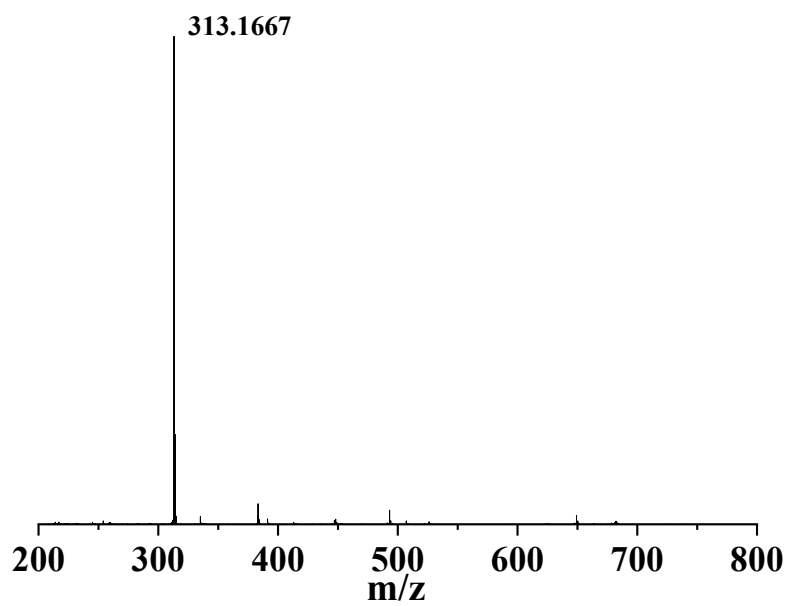

117  
118  
119

Figure. S3. HR-MS spectrum of SBN.

120 **8. Sensitivity fitting based on UV-vis and fluorescence excitation spectra of SBN**

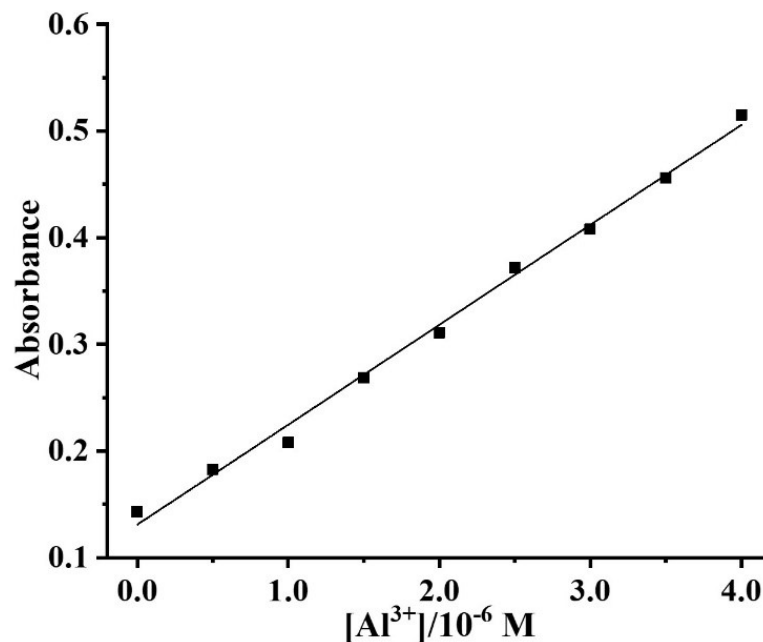

121

122 Figure. S4. The linear fitting between the absorption intensity of SBN at 402 nm and  
123 Al<sup>3+</sup> concentration in UV-vis spectra.

124

125

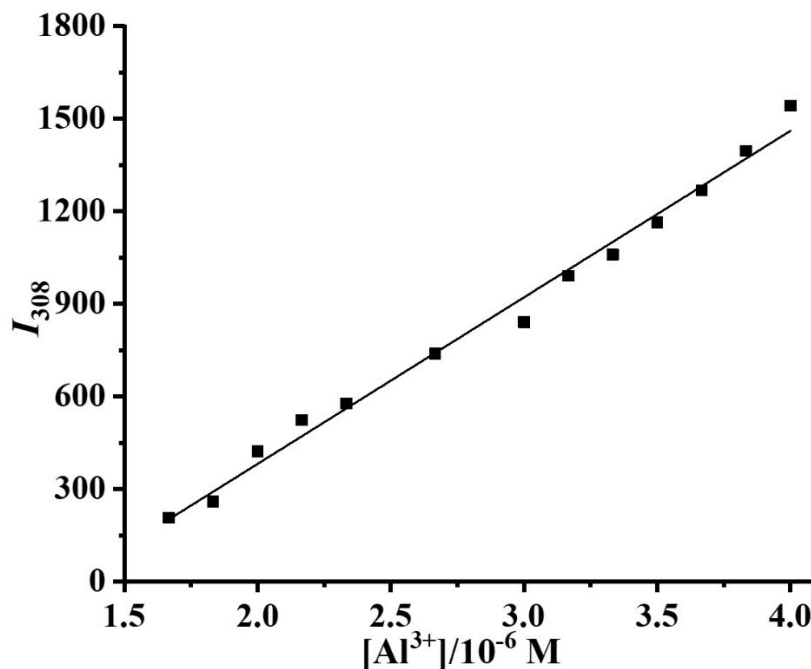

126

127 Figure. S5. The linear fitting between the excitation intensity of SBN at 308 nm and  
128 Al<sup>3+</sup> concentration in fluorescence excitation spectra ( $\lambda_{em}$  is 459 nm).

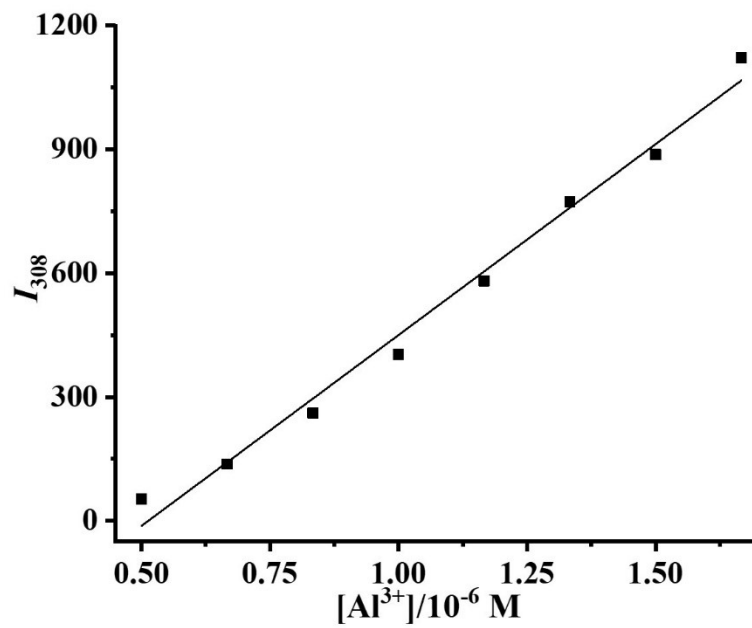

129

130 Figure. S6. The linear fitting between the excitation intensity of SBN at 308 nm and  
131 Al<sup>3+</sup> concentration in fluorescence excitation spectra ( $\lambda_{em}$  is 512 nm).
